# Supplementary material
Source: PubMed Central journal article supplement (PMC3306728)
Supplement: NIHMS357578-supplement-1_si_001.pdf [file NIHMS357578-supplement-1_si_001.pdf]

# ADVANCES IN PROLINE LIGATION

Steven D. Townsend,<sup>†</sup> Zhongping Tan,<sup>†</sup> Suwei Dong,<sup>†</sup> Shiyong Shang,<sup>†</sup> John Brailsford,<sup>†</sup>

Samuel J. Danishefsky<sup>†,‡,\*</sup>

<sup>†</sup>Laboratory for Bioorganic Chemistry, Sloan-Kettering Institute for Cancer Research, 1275 York Avenue, New York, NY 10065 <sup>‡</sup>Department of Chemistry, Columbia University, Havemeyer Hall, 3000 Broadway, New York, NY 10027

s-danishefsky@ski.mskcc.org

## Content

|                                                                              |     |
|------------------------------------------------------------------------------|-----|
| Material and Methods                                                         | S2  |
| Preparation and Characterization of compounds <b>34-36</b>                   | S4  |
| <sup>1</sup> H NMR and <sup>13</sup> C NMR spectra of compounds <b>34-36</b> | S6  |
| Preparation and Characterization of Peptide Precursors for Ligation          | S12 |
| Preparation and Characterization of Dethiolation Products                    | S18 |
| Preparation and Characterization of Deselenation Products                    | S21 |
| Preparation and Characterization of Ligation/Deselenation Products           | S25 |

**Materials and methods:**

All commercial materials (Aldrich, Fluka, Nova) were used without further purification. All solvents were reagent or HPLC grade (Fisher). Anhydrous DMF, THF, Et<sub>2</sub>O, CH<sub>2</sub>Cl<sub>2</sub>, toluene, and benzene were obtained from a dry solvent system (passed through column of alumina) and used without further drying. All reactions were performed under an atmosphere of pre-purified dry Ar(g). NMR spectra (<sup>1</sup>H and <sup>13</sup>C) were recorded on a Bruker Advance DRX-500 MHz, referenced to residual solvent. High-resolution mass spectral analyses were performed with a JOEL JMS-DX-303-HF mass spectrometer or Waters Micromass ZQ mass spectrometer. Analytical TLC was performed on E. Merck silica gel 60 F254 plates and flash column chromatography was performed on E. Merck silica gel 60 (40–63 mm). Yields refer to chromatographically pure compounds.

*Solid Phase Peptide Synthesis:* Automated peptide synthesis was performed on an Applied Biosystems Pioneer continuous flow peptide synthesizer. Peptides were synthesized using the standard automated Fmoc protocol (HATU, DIEA, DMF). The deblocking solution was a mixture of DMF/piperidine/DBU (100/5/5). The NovaSyn® TGT resins from EMD Biosciences were employed for the synthesis. The following amino acids from Sigma Aldrich, EMD Biosciences, Chem-Impex International and PolyPeptide Laboratories were employed: Boc-Gly-OH, Boc-Ala-OH, Boc-Phe-OH, Boc-Val-OH, Boc-Pro-OH, Fmoc-Asn(Trt)-OH, Fmoc-Glu(O<sup>t</sup>Bu)-OH, Fmoc-Leu-OH, Fmoc-Pro-OH, Fmoc-Ser(<sup>t</sup>Bu)-OH, Fmoc-Trp(Boc)-OH, Fmoc-Val-OH. Boc-Selenoproline-OH (Dimer) was synthesized. 0.55 eq of selenoproline was used along with an extended 2-hour reaction time for the amide bond-forming step.

*HPLC*: All separations of peptides involved a mobile phase of 0.05% TFA (v/v) in water (solvent A) / 0.04% TFA in acetonitrile (solvent B). Preparative and analytical HPLC separations were performed using a Rainin HPXL solvent delivery system equipped with a Rainin UV-1 detector. LC-MS chromatographic separations were performed using a Waters 2695 Separations Module and a Waters 996 Photodiode Array Detector equipped with XBridge™ C18 column (5.0 μm, 2.1 x 150 mm), X-Terra™ MS C18 column (3.5 μm, 2.1 x 100.0 mm) or Varian Microsorb C18 column (2 x 150 mm) at a flow rate of 0.2 mL/min. HPLC separations were performed using: X-Bridge™ Prep C18 column OBD™ (5.0 μm, 19 x 150 mm), a flow rate of 16 mL/min. Microsorb 100-5 C18 column at a flow rate of 16.0 mL/min or Microsorb 300-5 C4 column at a flow rate of 16.0 mL/min.

## Preparation and Characterization of compounds 34-36

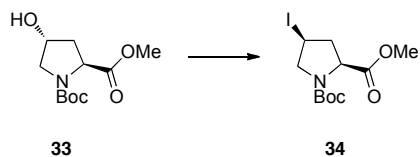

**(2S,4S)-1-tert-butyl 2-methyl 4-iodopyrrolidine-1,2-dicarboxylate (34).** To a stirred solution of *N*-Boc-*trans*-4-hydroxy-L-proline methyl ester **33** (2.45 g, 10.0 mmol) in THF (40 mL) at 0°C was added diisopropyl azodicarboxylate (2.45 g, 12.1 mmol), triphenylphosphine (3.90 g, 14.9 mmol) and methyl iodide (1.70 g, 12.0 mmol). After warming to ambient temperature and stirring for 3 hours, the reaction mixture was filtered and the filtrate concentrated *in vacuo*. The crude residue was purified by flash column chromatography (4:1, Hexanes:EtOAc) to provide **34** (3.08 g, 8.70 mmol, 87%), as a white solid: spectral data consistent with reported values<sup>1</sup>

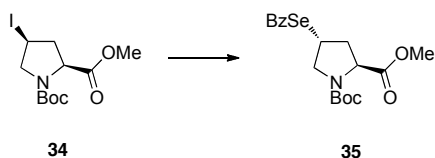

**(2S,4R)-1-tert-butyl 2-methyl-4-(benzoylselanyl)pyrrolidine-1,2 dicarboxylate (35).** To a solution of benzoic acid (278 mg, 2.28 mmol) in toluene (1 mL) was added Woollins Reagent (404 mg, 0.76 mmol) and the reaction was warmed to reflux. After 2 hours the reaction was cooled to 50°C. **34** (135 mg, 0.38 mmol) was dissolved in DMF (1 mL) and added dropwise to the reaction mixture followed by the addition of diisopropylethylamine (500  $\mu$ L, 2.85 mmol). After 2 hours the reaction mixture was diluted with water (5 mL) and extracted with EtOAc (3 x 5 mL). The organics were dried ( $\text{MgSO}_4$ ), filtered, and concentrated *in vacuo*. The crude residue was purified by flash

column chromatography (gradient 10:1 to 4:1, Hexanes:EtOAc) to provide **35** (132 mg, 0.32 mmol, 84%) as a white solid:  $[\alpha]_D^{25} = -18.8$  ( $c = 0.03$ ,  $\text{CHCl}_3$ ); mp 92-94°C;  $R_f$  0.4 (4:1, Hex:EtOAc); IR ( $\text{cm}^{-1}$ ): 2950, 2250, 1752, 1694, 1644, 1396;  $^1\text{H}$  NMR ( $\text{CDCl}_3$ ):  $\delta$ 7.86 (d, 2H,  $J = 5.35$  Hz), 7.63-7.59 (m, 1H), 7.48-7.45 (m, 2H), 4.48 (ddd, 1H,  $J = 6.90, 5.85, 4.40$  Hz), 4.24 (t, 1H,  $J = 6.50$  Hz), 4.11 (ddd, 1H,  $J = 6.90, 6.85, 4.45$  Hz), 3.78 (s, 3H), 3.69 (ddd, 1H,  $J = 6.50, 5.45, 4.55$  Hz), 2.61 (m, 2H), 1.47-1.43 (s, 9H);  $^{13}\text{C}$  NMR ( $\text{CDCl}_3$ ):  $\delta$ 195.3, 174.4, 174.1, 155.5, 154.8, 140.0, 135.4, 129.8, 128.7, 81.9, 60.3, 59.9, 53.8, 53.6, 39.5, 37.9, 29.8, 29.7; ESMS calcd for  $\text{C}_{18}\text{H}_{23}\text{NO}_5\text{SeNa}$  ( $\text{M} + \text{Na}^+$ ): 436.06, Found ( $\text{M} + \text{Na}^+$ ): 436.1.

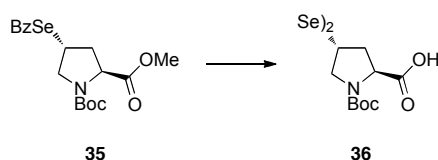

**(2S,4R)-1-(tert-butoxycarbonyl)-4-hydroselenopyrrolidine-2-carboxylic acid (36).**

To a solution of **35** (103 mg, 0.25 mmol) in 10% aq. MeOH (2.5 mL) at 0°C is added  $\text{K}_2\text{CO}_3$  (96 mg, 0.50 mmol). After 2 hours, AcOH (500  $\mu\text{L}$ ) was added, the reaction mixture diluted with brine (5 mL) and extracted with  $\text{CH}_2\text{Cl}_2:n\text{BuOH}$  (10:1, 3 x 5 mL). The organics were dried ( $\text{MgSO}_4$ ), filtered, and concentrated *in vacuo*. The crude residue was purified by flash column chromatography (EtOAc:AcOH, 95:5) to provide **36** (117 mg, 0.20 mmol, 79%) as a pale yellow foam:  $[\alpha]_D^{25} = -102.8$  ( $c = 0.03$ ,  $\text{CHCl}_3$ );  $R_f$  0.2 (EtOAc); IR ( $\text{cm}^{-1}$ ): 3395, 2980, 2253, 1688, 1402, 1162;  $^1\text{H}$  NMR ( $\text{CDCl}_3$ ):  $\delta$ 4.49 (m, 1H), 3.96 (m, 1H), 3.77 (m, 1H), 3.54 (m, 1H), 2.59 (m, 2H), 1.52-1.45 (s, 9H);  $^{13}\text{C}$  NMR ( $\text{CDCl}_3$ ): 179.2, 178.3, 156.9, 83.5, 82.5, 60.2, 55.0, 39.6, 37.8, 29.7, 29.6, 22.1; ESMS calcd for  $\text{C}_{20}\text{H}_{32}\text{N}_2\text{O}_8\text{Se}_2\text{Na}$  ( $\text{M} + \text{Na}^+$ ): 611.03, Found ( $\text{M} + \text{Na}^+$ ): 611.2.

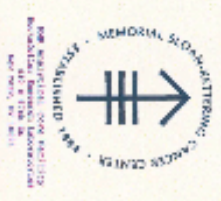

1H NMR (400 MHz, CDCl3) of compound 34. The spectrum shows peaks in the aromatic region (6.8-8.2 ppm), a methoxy singlet (3.8 ppm), and aliphatic signals (1.4-4.5 ppm). Integration values are provided for several peaks.

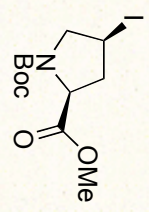

34

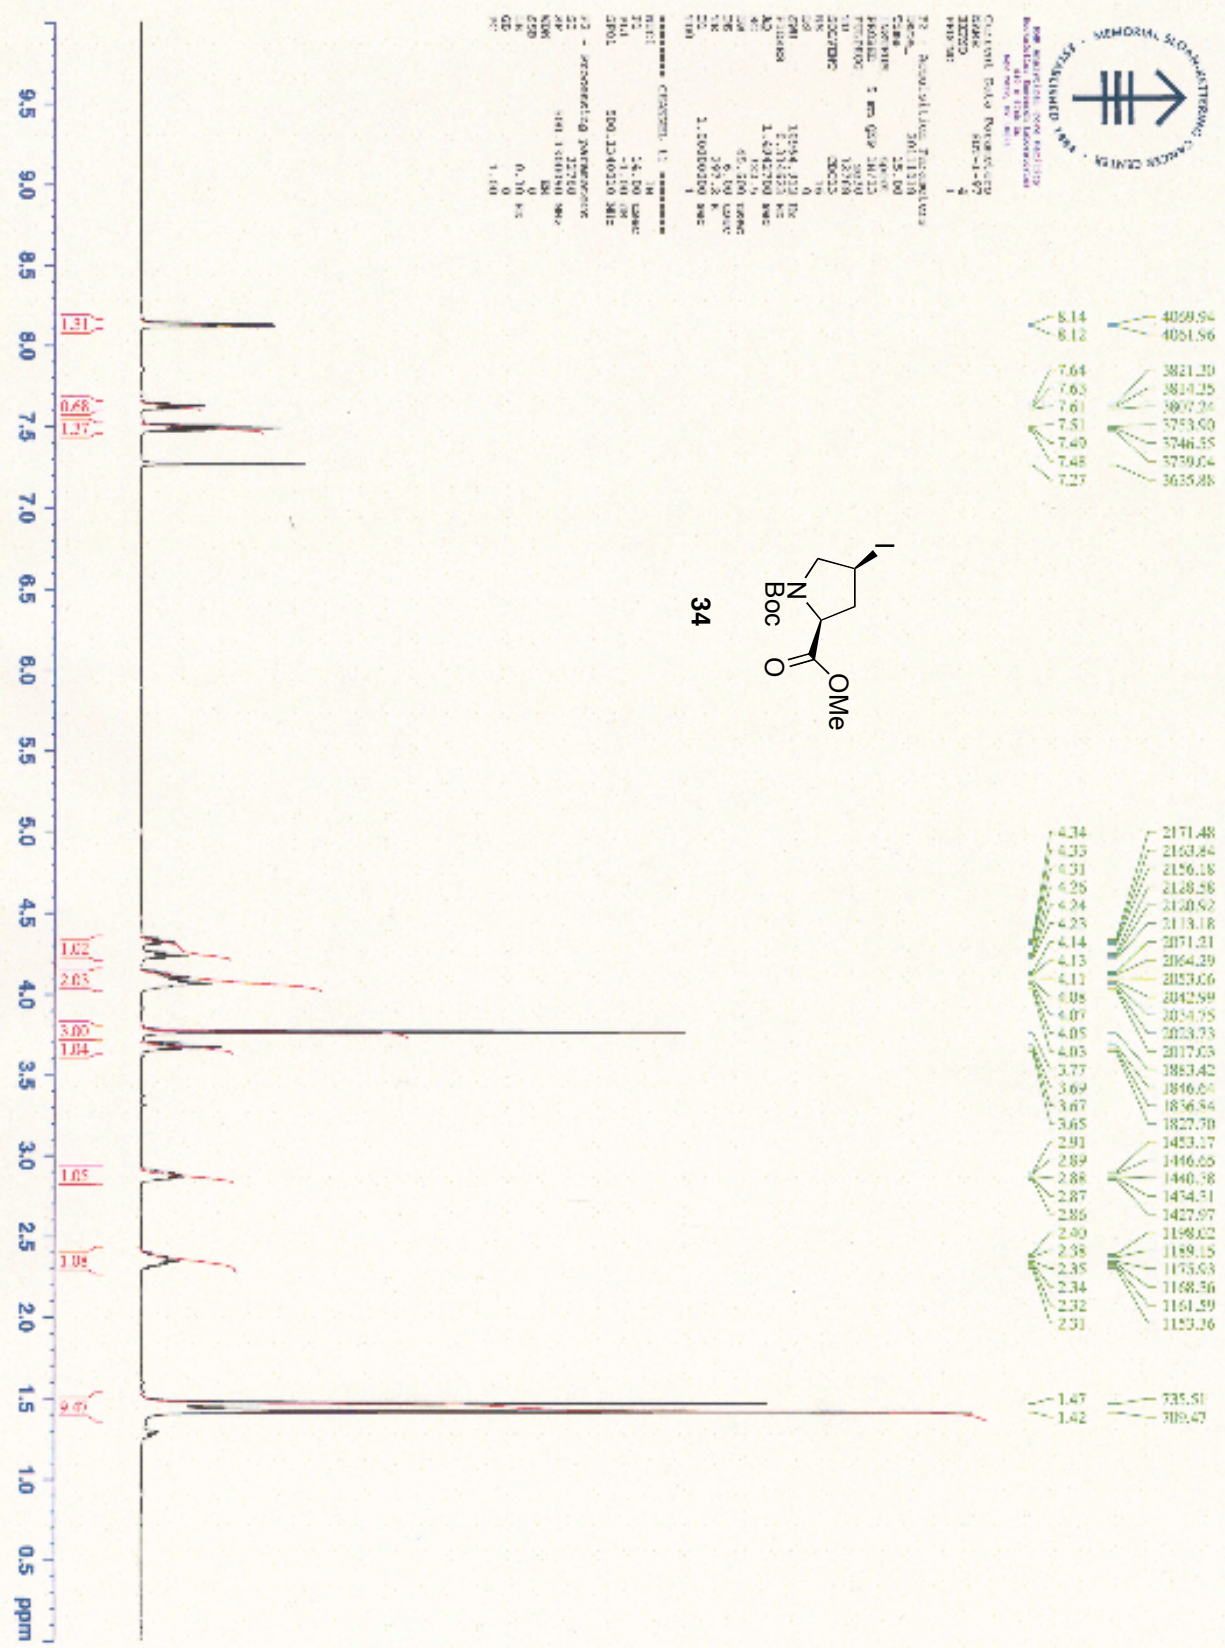



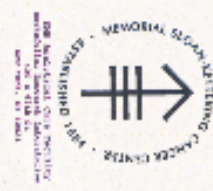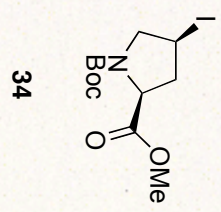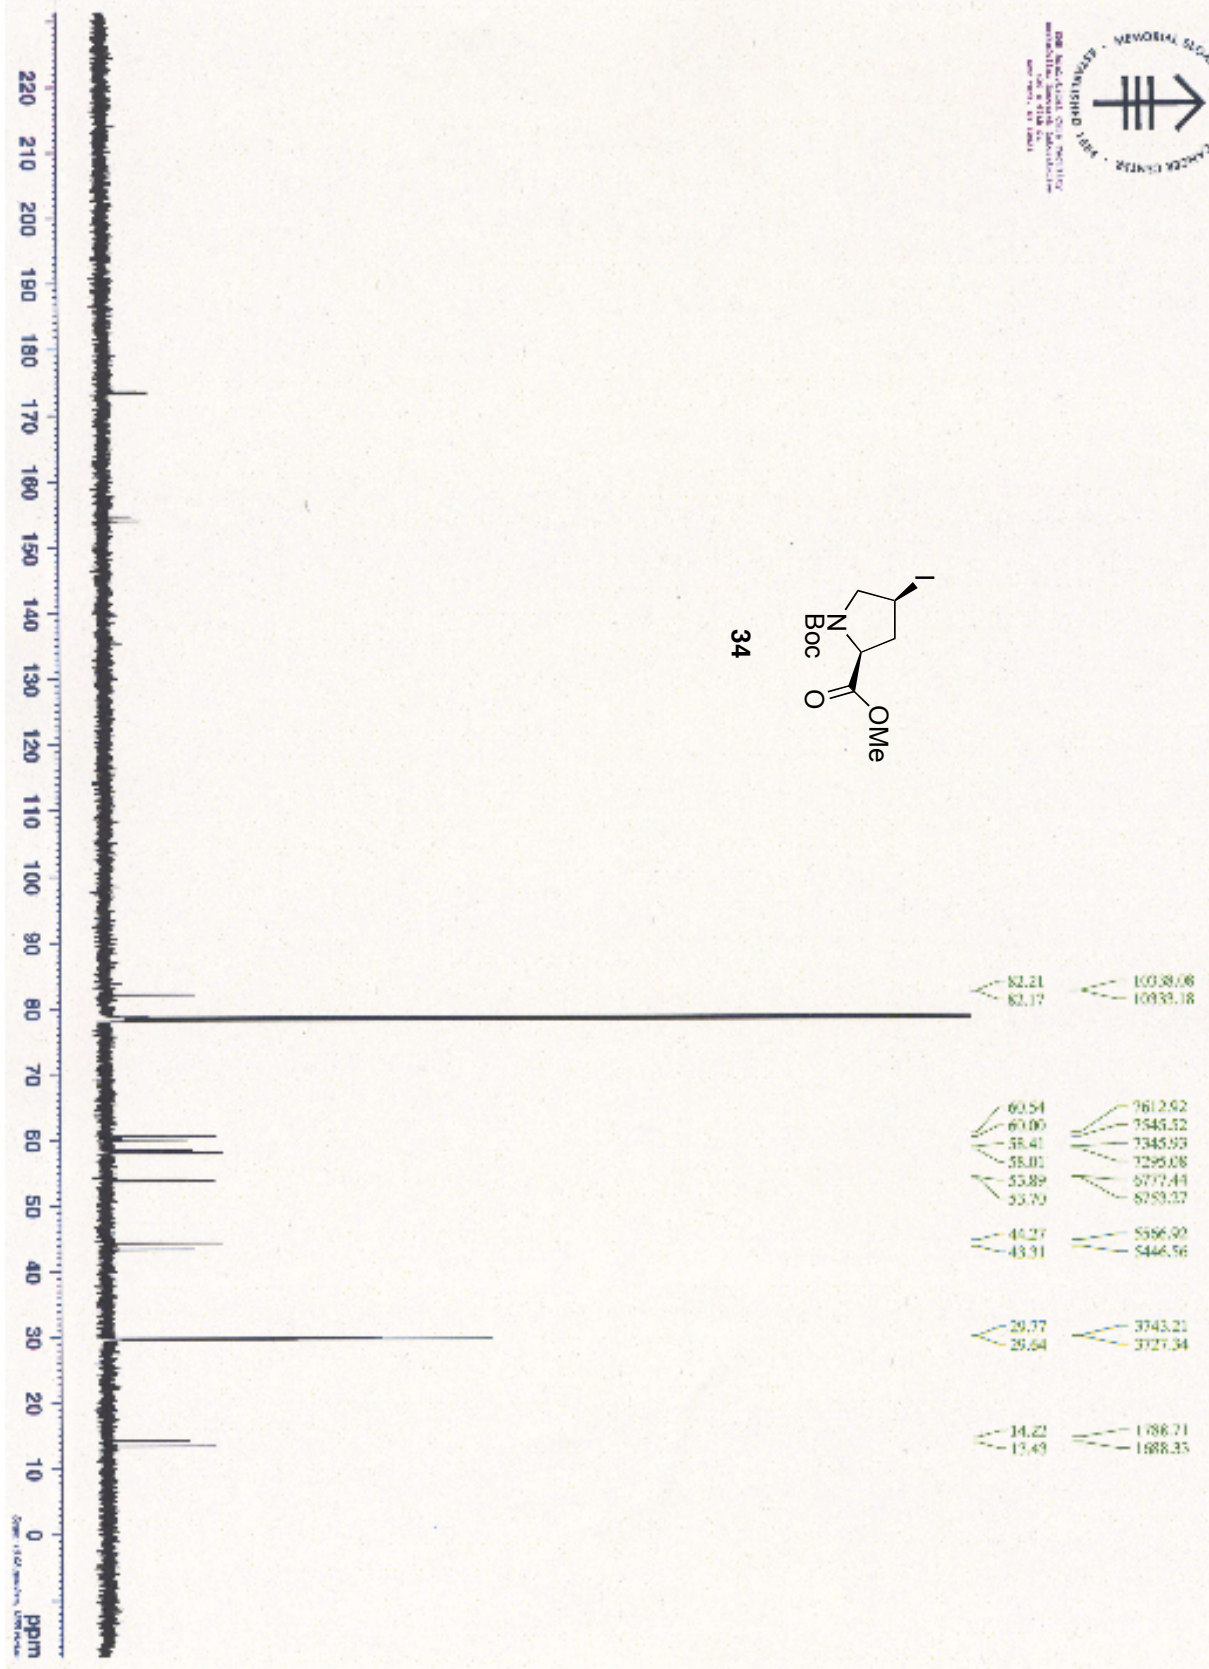





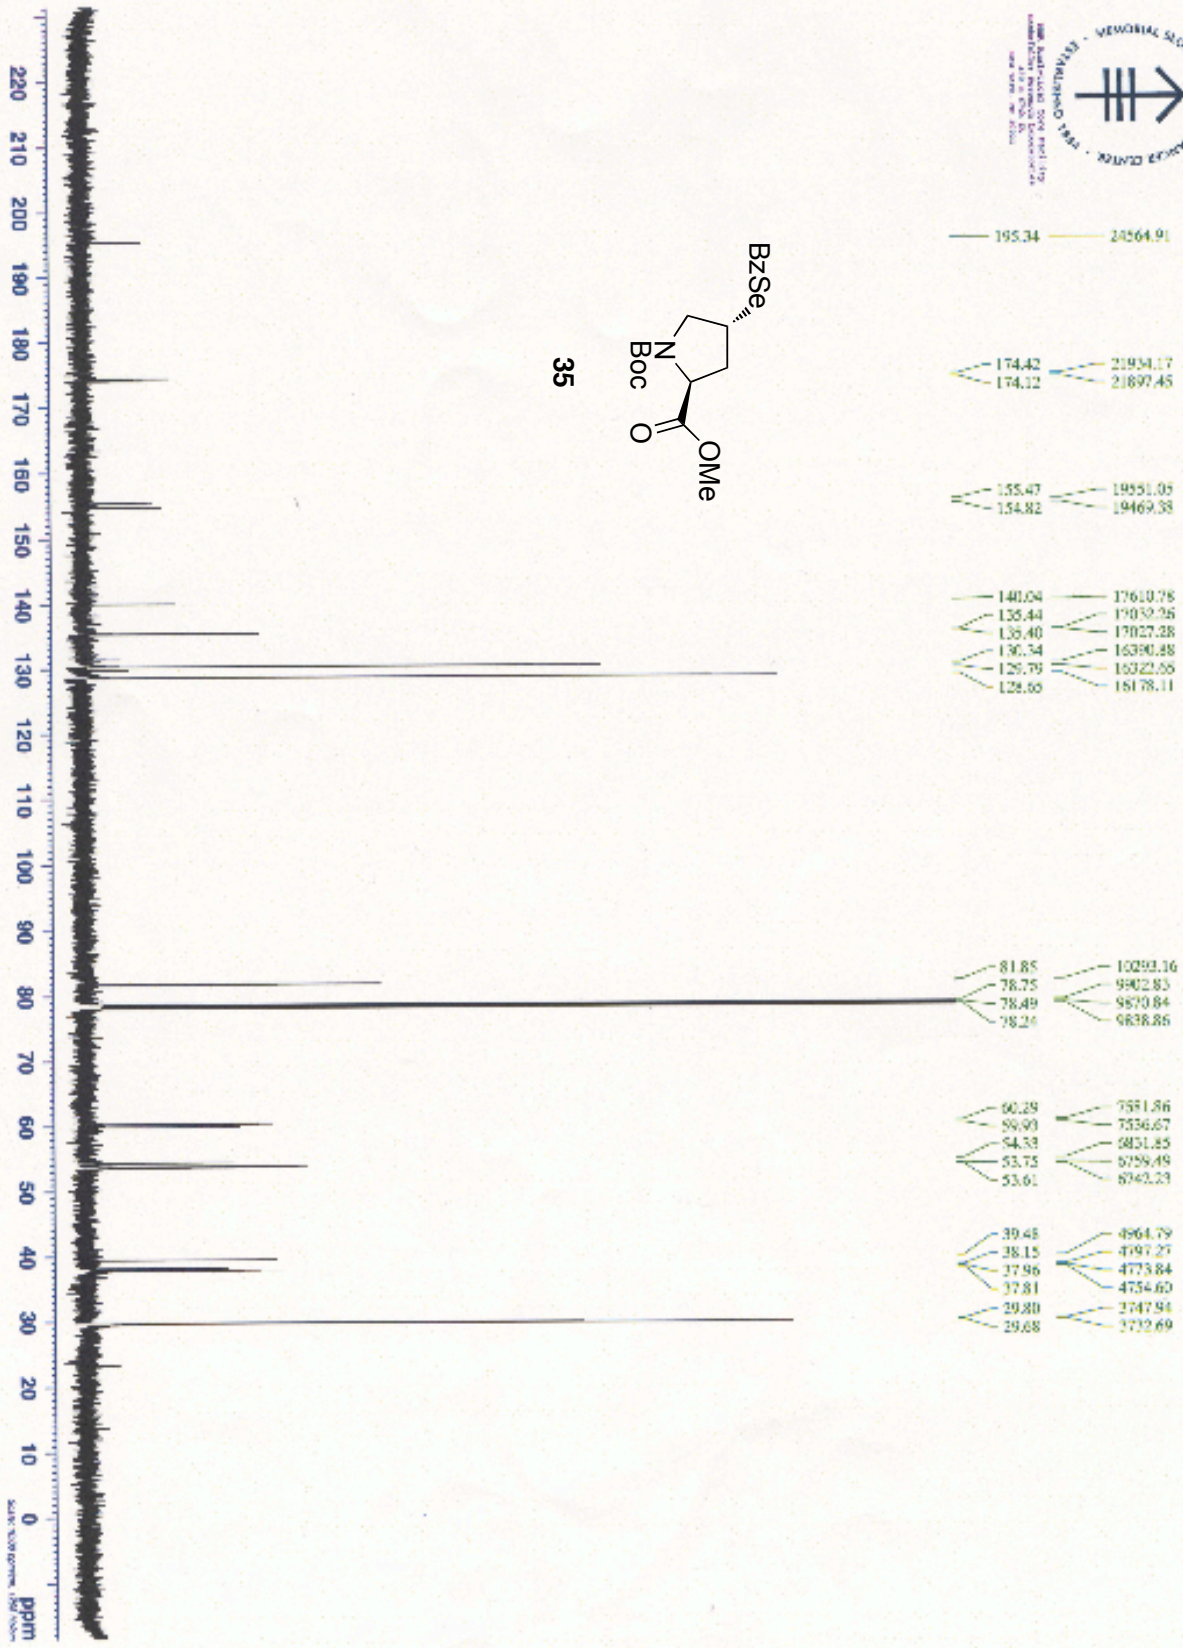





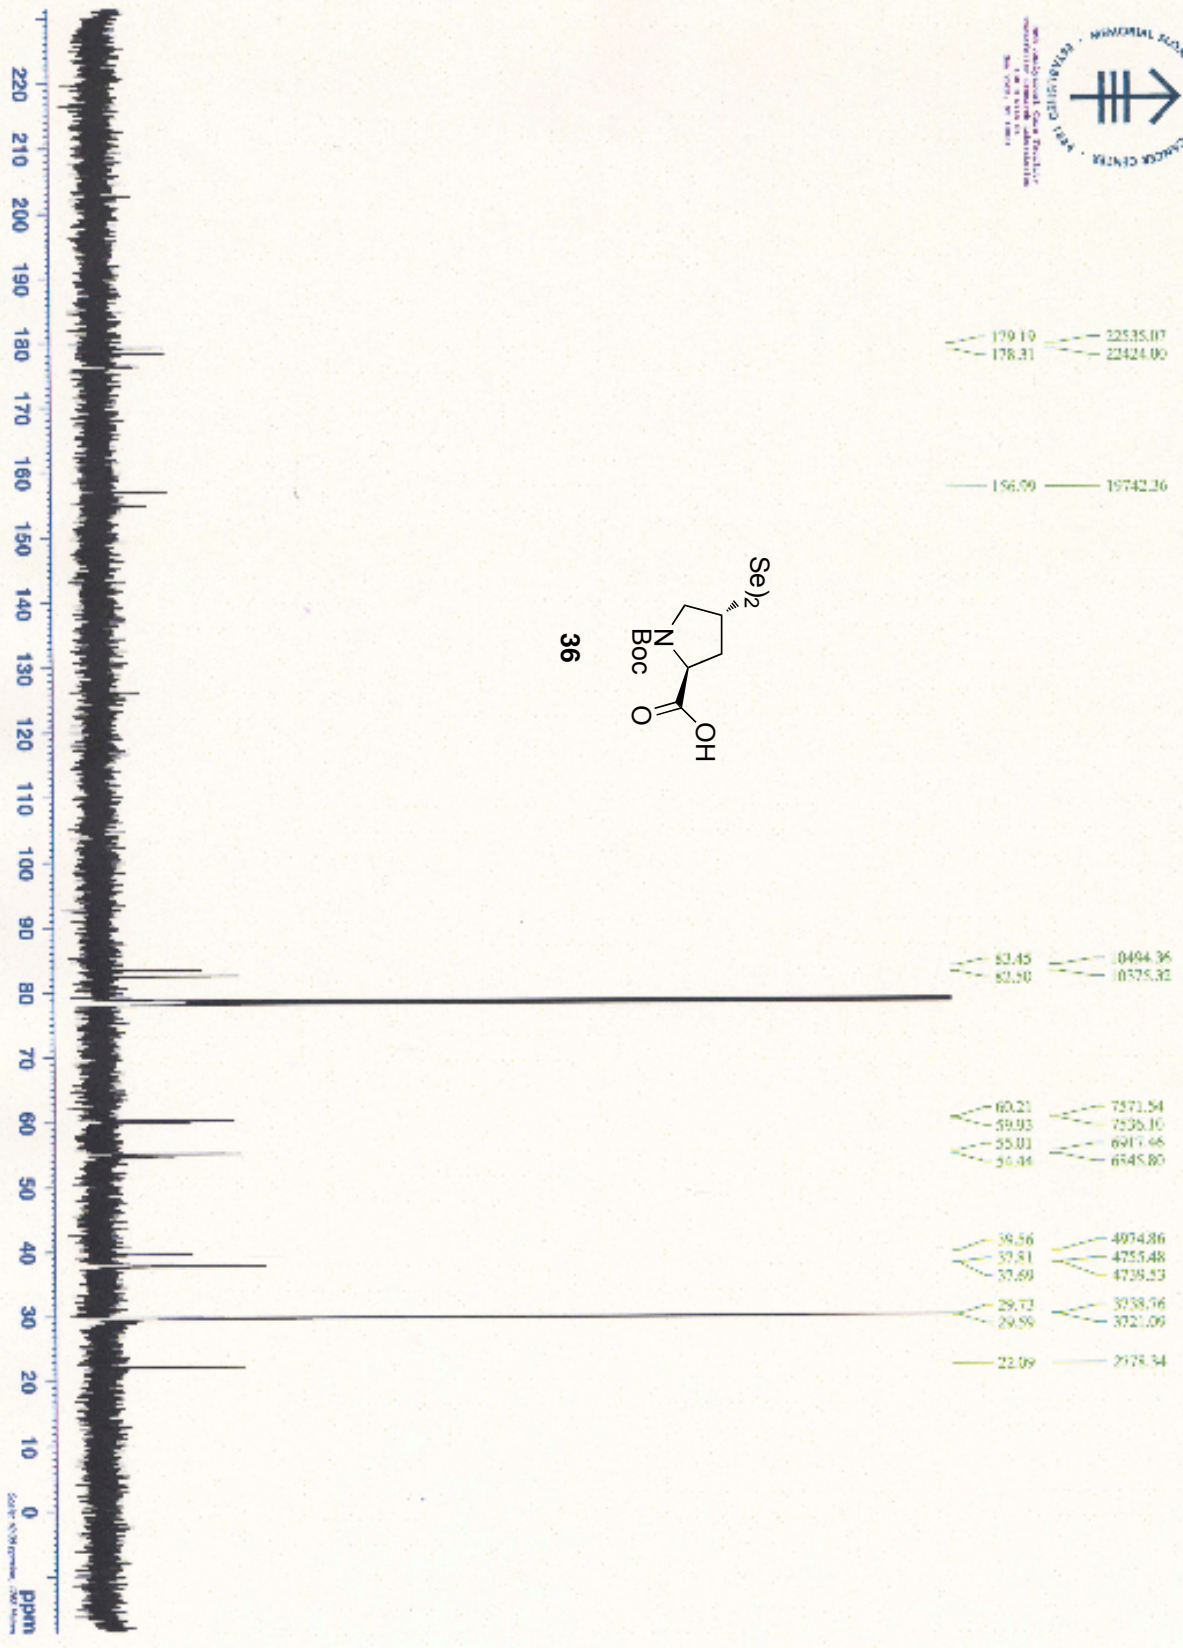

## Preparation and Characterization of Peptide Precursors for Ligation

**Unprotected Peptides:** Upon completion of automated synthesis on a 0.05 mmol scale, the peptide resin was washed into a peptide cleavage vessel with  $\text{CH}_2\text{Cl}_2$ . The resin cleavage was affected by treatment with TFA/ $\text{H}_2\text{O}$ /TIS (95:2.5:2.5) for 45 min to provide the unprotected peptides. The solvent was removed by a stream of  $\text{N}_2$  and the residue triturated with  $\text{Et}_2\text{O}$  and centrifuged to give a white pellet. After the  $\text{Et}_2\text{O}$  was decanted, the solid was dissolved in 30% aq.  $\text{CH}_3\text{CN}$  (5% AcOH) for HPLC purification.

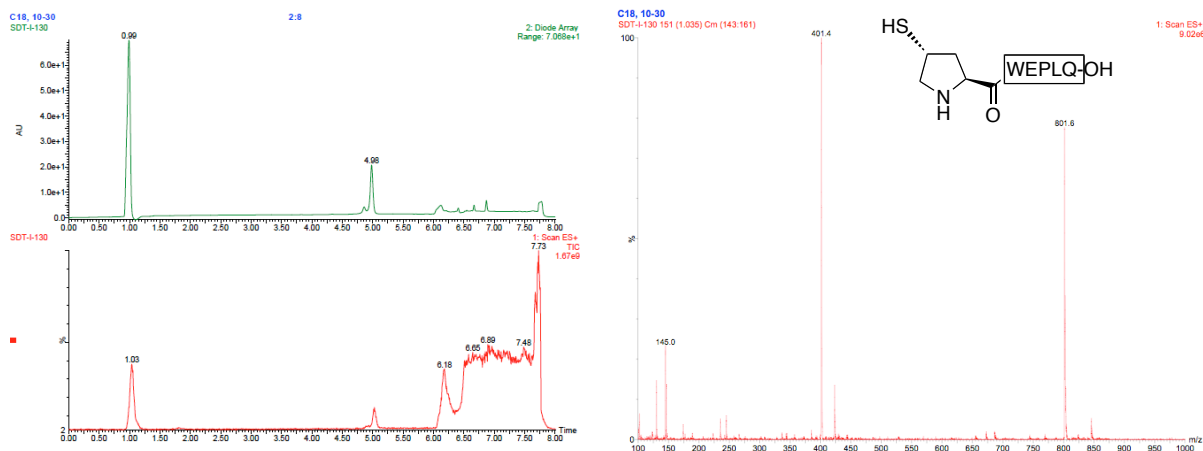

**41:**  $\text{C}_{37}\text{H}_{52}\text{N}_8\text{O}_{10}\text{S}$ , Exact Mass: 800.35,  $[\text{M}+\text{H}]^+$   $m/z$  = 801.35,  $[\text{M}+2\text{H}]^{2+}$   $m/z$  = 401.18.

Found:  $[\text{M}+\text{H}]^+$   $m/z$  = 801.6,  $[\text{M}+2\text{H}]^{2+}$   $m/z$  = 401.4.



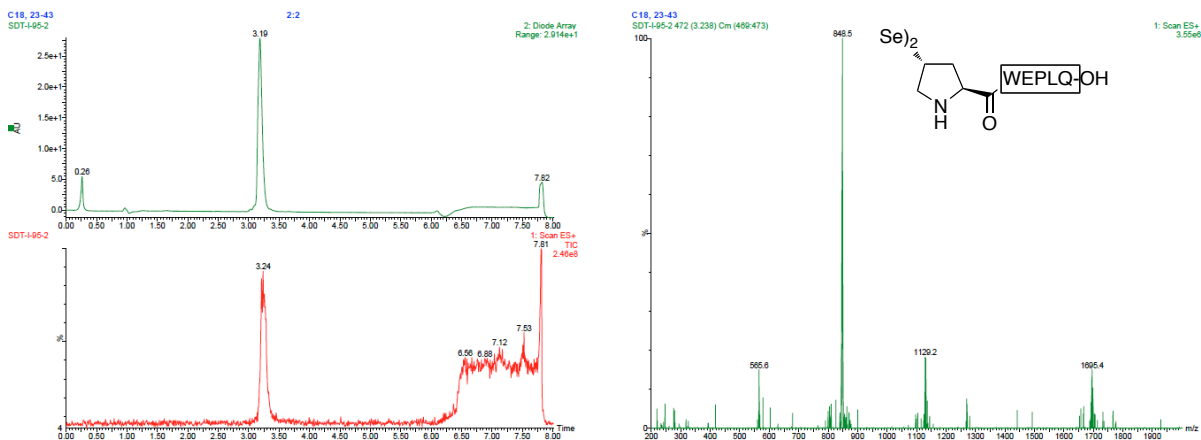

**43:**  $C_{74}H_{102}N_{16}O_{20}Se_2$ , Exact Mass: 1694.57,  $[M+H]^+$   $m/z = 1695.57$ ,  $[M+2H]^{2+}$   $m/z = 848.29$ .

Found:  $[M+H]^+$   $m/z = 1695.4$ ,  $[M+2H]^{2+}$   $m/z = 848.5$ .

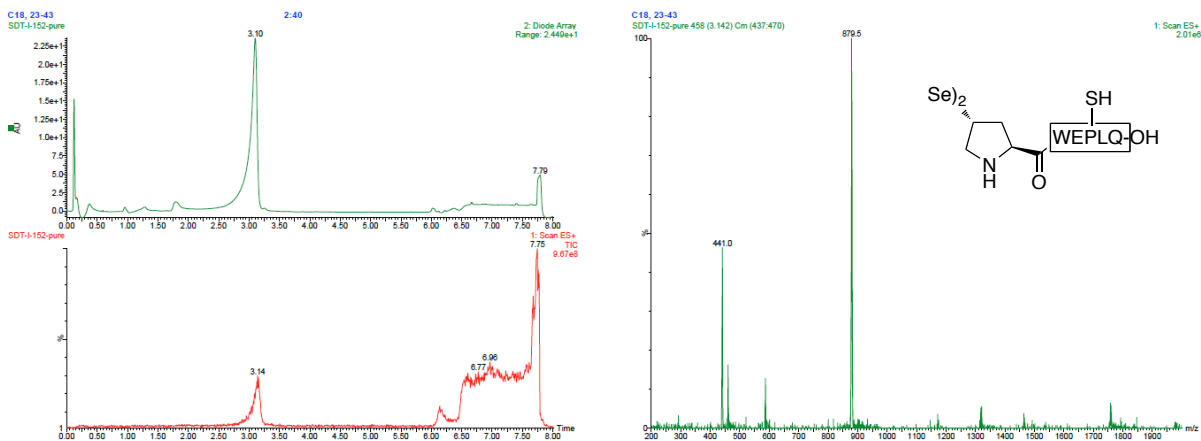

**45:**  $C_{74}H_{102}N_{16}O_{20}S_2Se_2$ , Exact Mass: 1759.52,  $[M+2H]^{2+}$   $m/z = 880.26$ ,  $[M+4H]^{4+}$   $m/z = 440.88$ .

Found:  $[M+2H]^{2+}$   $m/z = 879.5$ ,  $[M+4H]^{4+}$   $m/z = 441.0$ .

**Fully Protected Peptidyl Acid:** Upon completion of automated synthesis on a 0.05 mmol scale, the peptide resin was washed into a peptide cleavage vessel with  $CH_2Cl_2$ . The resin cleavage was affected by treatment with AcOH/TFE/DCM (1:1:3) for 2 x 1

hour to provide the peptidyl acids. The solvent was removed by a stream of N<sub>2</sub>. The residue was triturated with Et<sub>2</sub>O and centrifuged to give a white pellet. After the Et<sub>2</sub>O was decanted, the solid was dissolved in 50% aq. CH<sub>3</sub>CN and lyophilized to dryness.

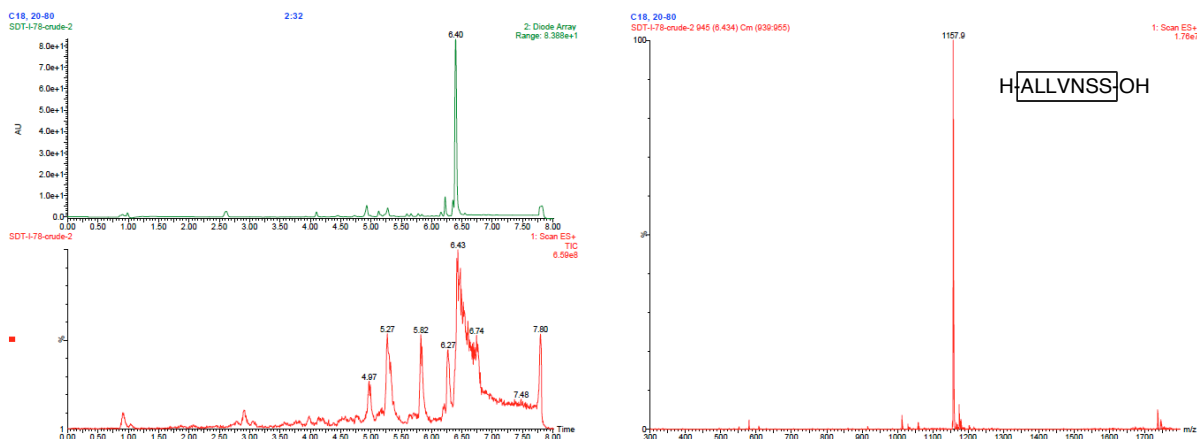

Peptidyl Acid: C<sub>62</sub>H<sub>91</sub>N<sub>8</sub>O<sub>13</sub>, Exact Mass: 1155.67, [M+H]<sup>+</sup> m/z = 1156.67.

Found: [M+H]<sup>+</sup> m/z = 1157.9

**Peptide Thiophenolic Esters:** The peptidyl acid (0.043 mmol) and HCl□H-AA-SPh (0.13 mmol) were dissolved in CHCl<sub>3</sub>:TFE (3:1, 4 mL) and cooled to -10 °C. HOObt (0.13 mmol) and EDCI (0.13 mmol) were added and the reaction stirred at ambient temperature for 2.5 hours. The solvent was removed by a stream of N<sub>2</sub> and the oil dissolved in CH<sub>2</sub>Cl<sub>2</sub> (10 mL). The organics were washed with H<sub>2</sub>O (3 x 5 mL) and concentrated by a stream of N<sub>2</sub>. TFA/H<sub>2</sub>O/TIS (95:2.5:2.5, 5 ml) was added and the reaction stirred 20 minutes. The solvent was removed by a stream of N<sub>2</sub> and the residue triturated with Et<sub>2</sub>O and centrifuged to give a white pellet. After the Et<sub>2</sub>O was decanted, the solid was dissolved in 30% aq. CH<sub>3</sub>CN (5% AcOH) for HPLC purification.

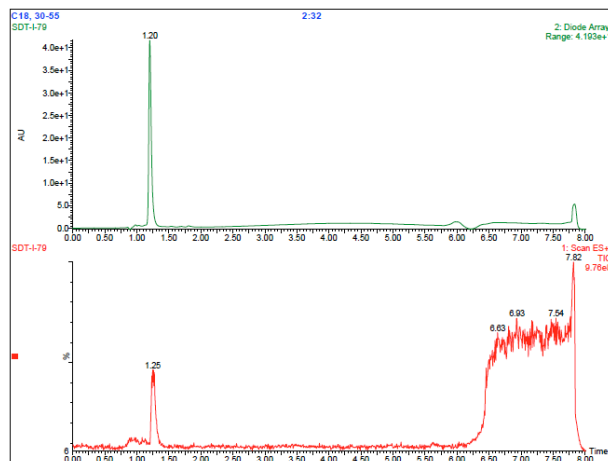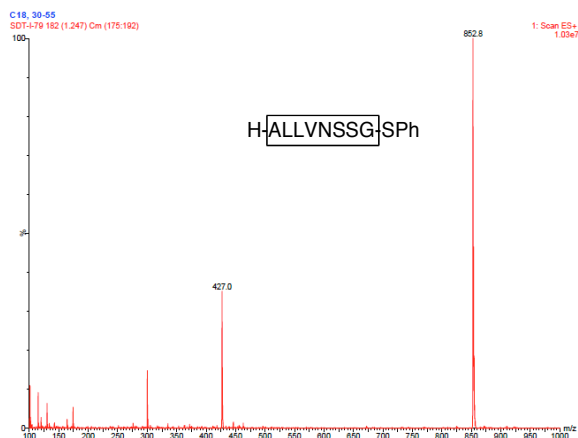

**38:**  $C_{38}H_{61}N_9O_{11}S$ , Exact Mass: 851.42,  $[M+H]^+$   $m/z = 852.42$ ,  $[M+2H]^{2+}$   $m/z 426.71$ .

Found:  $[M+H]^+$   $m/z = 852.8$ ,  $[M+2H]^{2+}$   $m/z 427.0$ .

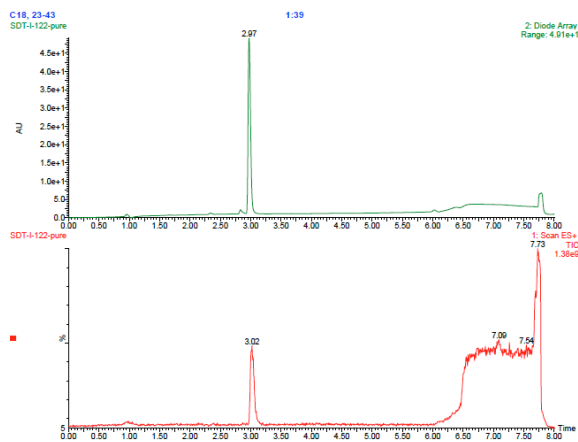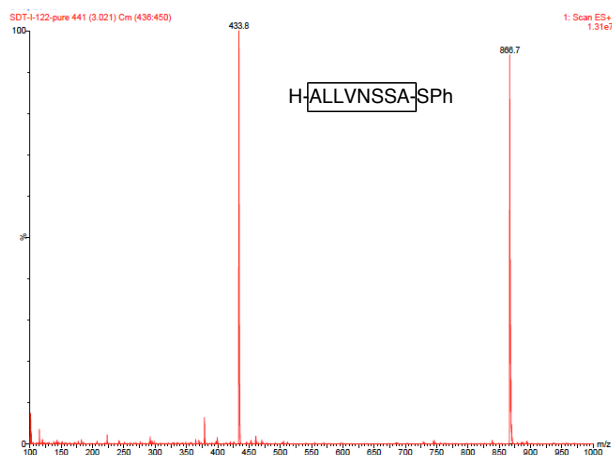

**48:**  $C_{39}H_{63}N_9O_{11}S$ , Exact Mass: 865.44,  $[M+H]^+$   $m/z = 866.40$ ,  $[M+2H]^{2+}$   $m/z 433.72$ .

Found:  $[M+H]^+$   $m/z = 866.7$ ,  $[M+2H]^{2+}$   $m/z 433.8$ .

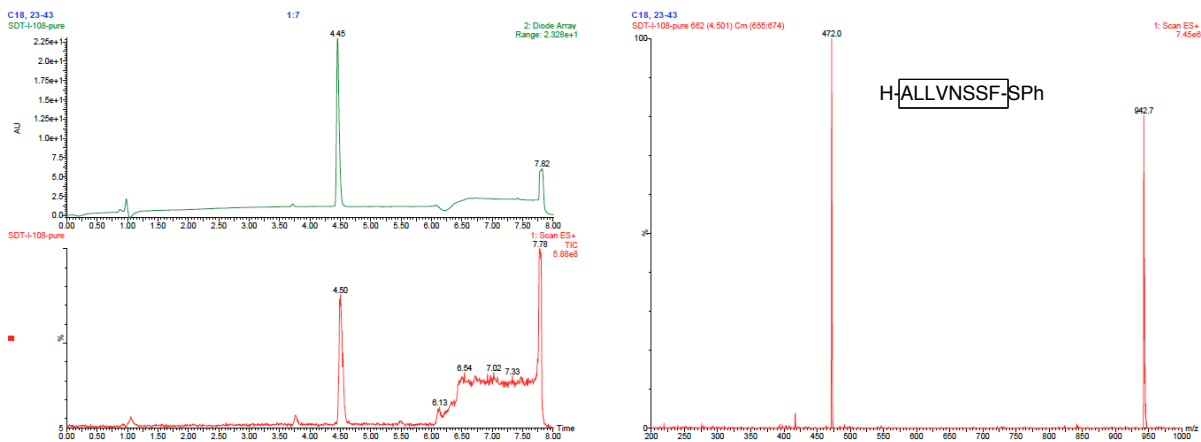

**50:**  $C_{45}H_{67}N_9O_{11}S$ , Exact Mass: 941.47,  $[M+H]^+$   $m/z = 942.5$ ,  $[M+2H]^{2+}$   $m/z 471.74$ .

Found:  $[M+H]^+$   $m/z = 942.7$ ,  $[M+2H]^{2+}$   $m/z 472.0$ .

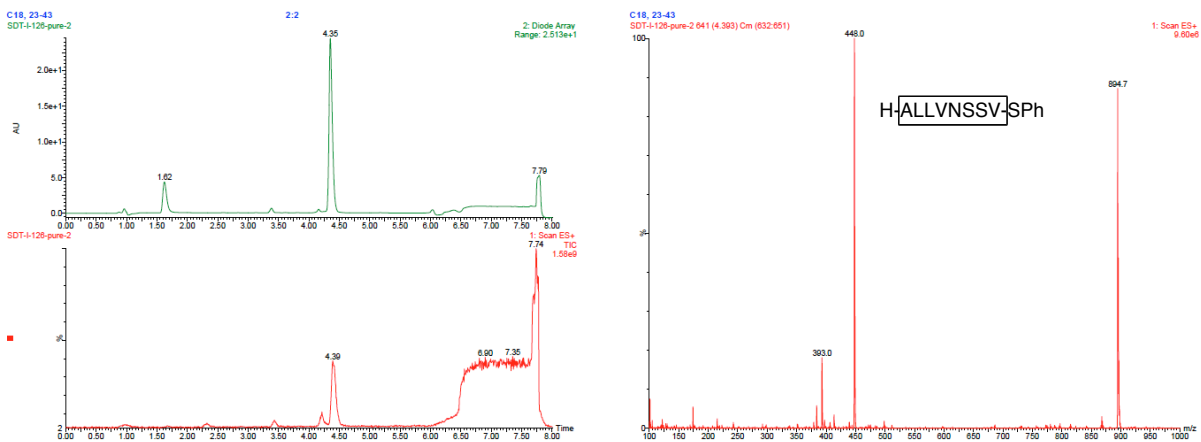

**52:**  $C_{41}H_{67}N_9O_{13}S$ , Exact Mass: 893.47,  $[M+H]^+$   $m/z = 894.47$ ,  $[M+2H]^{2+}$   $m/z 447.7$ .

Found:  $[M+H]^+$   $m/z = 894.7$ ,  $[M+2H]^{2+}$   $m/z 448.0$ .



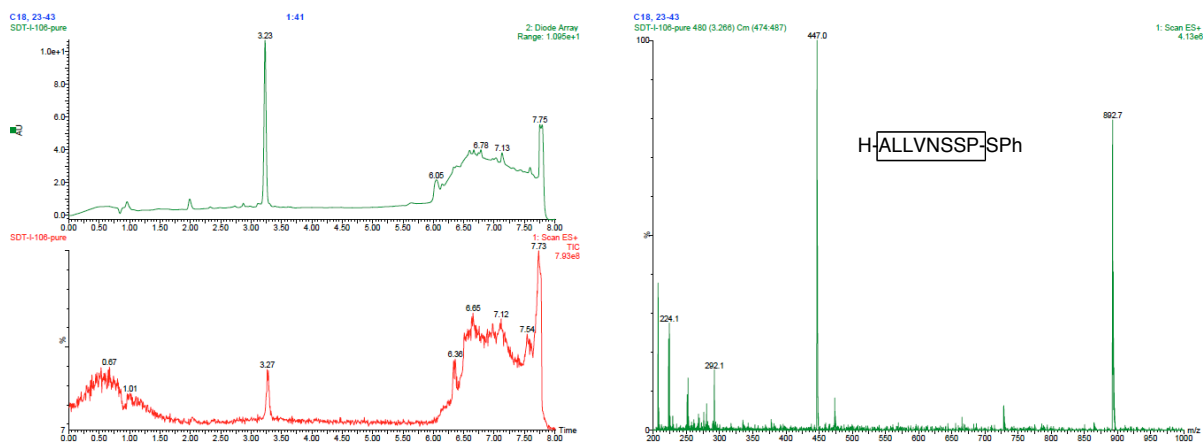

**54:**  $C_{45}H_{71}N_{11}O_{11}S$ , Exact Mass: 891.45,  $[M+H]^+$   $m/z = 892.45$ ,  $[M+2H]^{2+}$   $m/z 446.73$ .

Found:  $[M+H]^+$   $m/z = 892.7$ ,  $[M+2H]^{2+}$   $m/z 447.0$ .

## Preparation and Characterization of Dethiolation Products

To a solution of thiopeptide (2  $\mu\text{mol}$ ) in degassed 50% aq.  $\text{CH}_3\text{CN}$  (200  $\mu\text{l}$ ) was added TCEP bond-breaker® solution (Pierce, 200  $\mu\text{l}$ , 0.5 M), t-BuSH (200  $\mu\text{l}$ ) and VA-044 radical initiator (200  $\mu\text{l}$ , 0.1 M in  $\text{H}_2\text{O}$ ) and the reaction mixture was stirred at 37°C. The reaction was monitored by UPLC-MS and purified by HPLC.

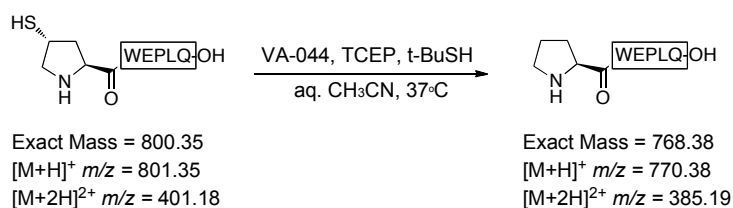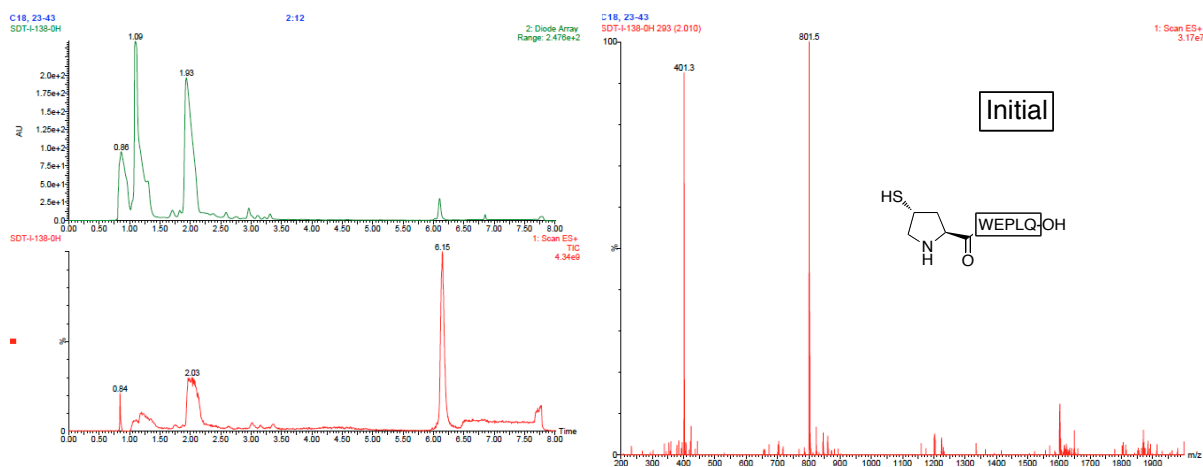

Found: [M+H]<sup>+</sup> *m/z* = 801.5, [M+2H]<sup>2+</sup> *m/z* 401.3.

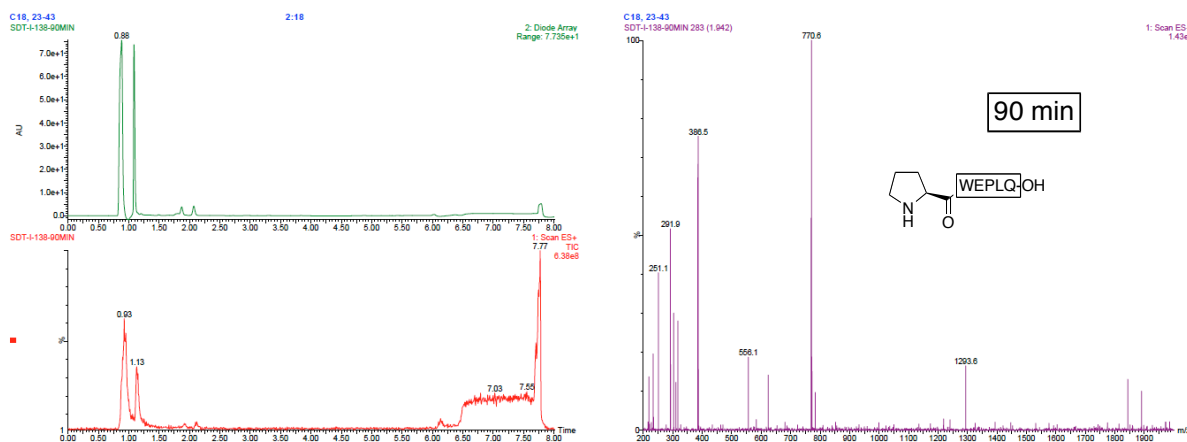

Found:  $[M+H]^+$   $m/z = 770.6$ ,  $[M+2H]^{2+}$   $m/z = 386.5$ , 83%

To a solution of thiopeptide (2  $\mu\text{mol}$ ) in 50% aq.  $\text{CH}_3\text{CN}$  (200  $\mu\text{l}$ ) was added TCEP (200  $\mu\text{l}$ , 0.5 M),  $t\text{-BuSH}$  (200  $\mu\text{l}$ ) and VA-044 radical initiator (200  $\mu\text{l}$ , 0.1 M in  $\text{H}_2\text{O}$ ) and the reaction mixture was stirred at 5°C. After 48 h, the reaction was warmed to ambient temperature to observe slow dethiolation. The reaction was monitored by UPLC-MS.

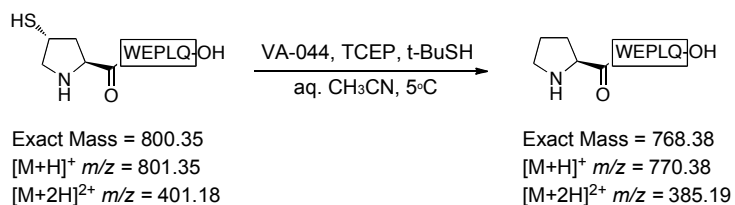

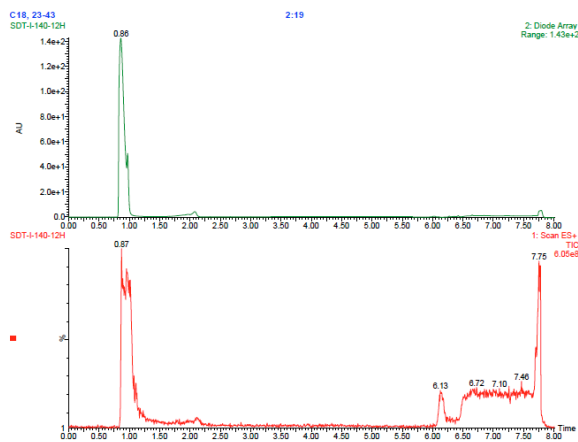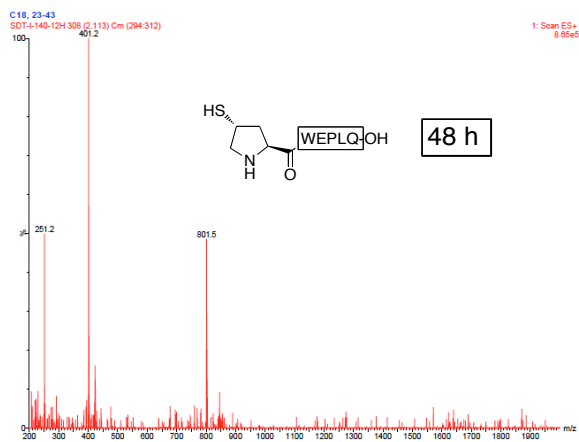

Found:  $[M+H]^+$   $m/z = 801.5$ ,  $[M+2H]^{2+}$   $m/z 401.3$ .

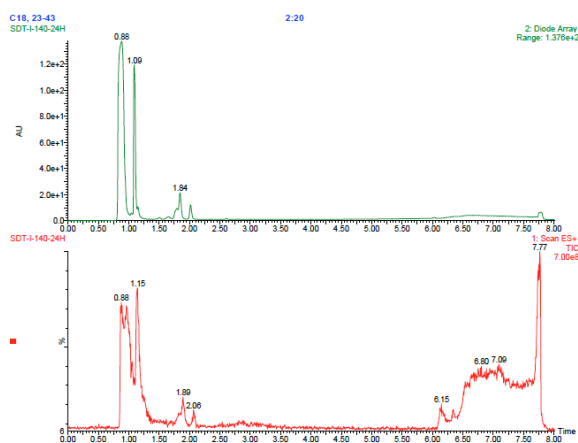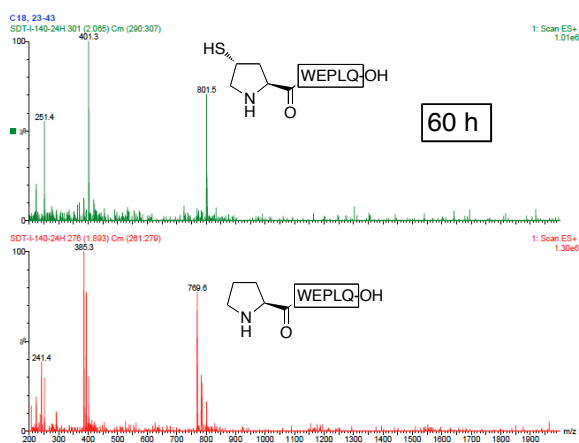

Found:  $[M+H]^+$   $m/z = 801.5$ ,  $[M+2H]^{2+}$   $m/z 401.3$  and  $[M+H]^+$   $m/z = 769.6$ ,  $[M+2H]^{2+}$   $m/z 385.3$ .



## Preparation and Characterization of Deselenation Products

To a solution of selenopeptide (2  $\mu\text{mol}$ ) in 500  $\mu\text{l}$  of ligation buffer (6 M Gdm•HCl, 200 mM  $\text{Na}_2\text{HPO}_4$ ) was added TCEP (200  $\mu\text{l}$ , 0.5 M) and the pH adjusted to 5-6 by 1 M HCl. The reaction mixture was stirred at 23°C, monitored by UPLC-MS and purified directly by HPLC.

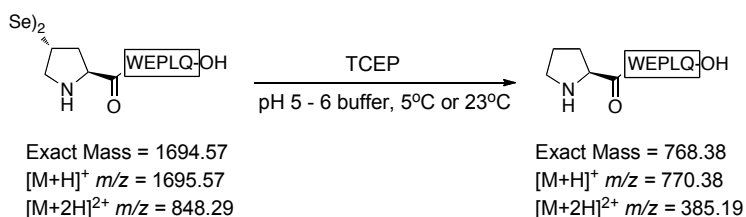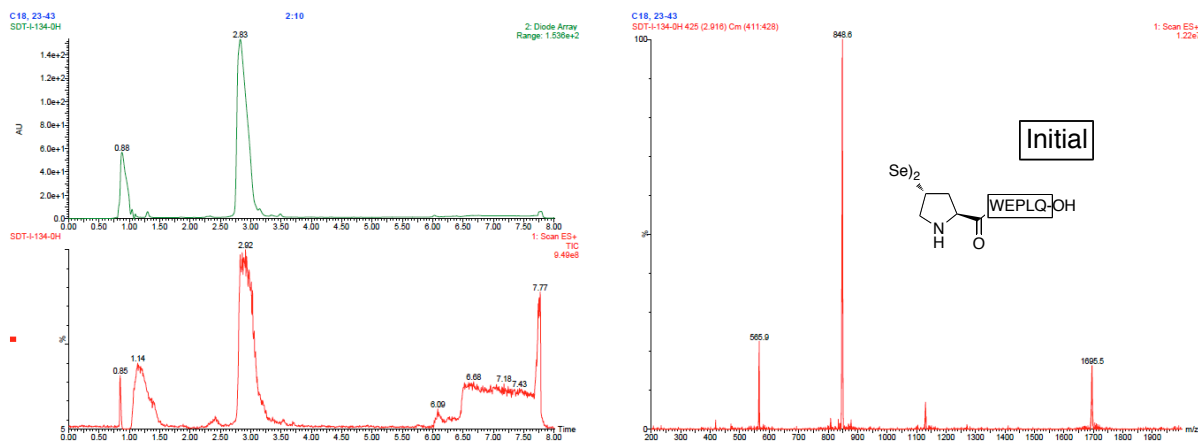

Found: [M+H]<sup>+</sup> *m/z* = 1695.5, [M+2H]<sup>2+</sup> *m/z* 848.6.

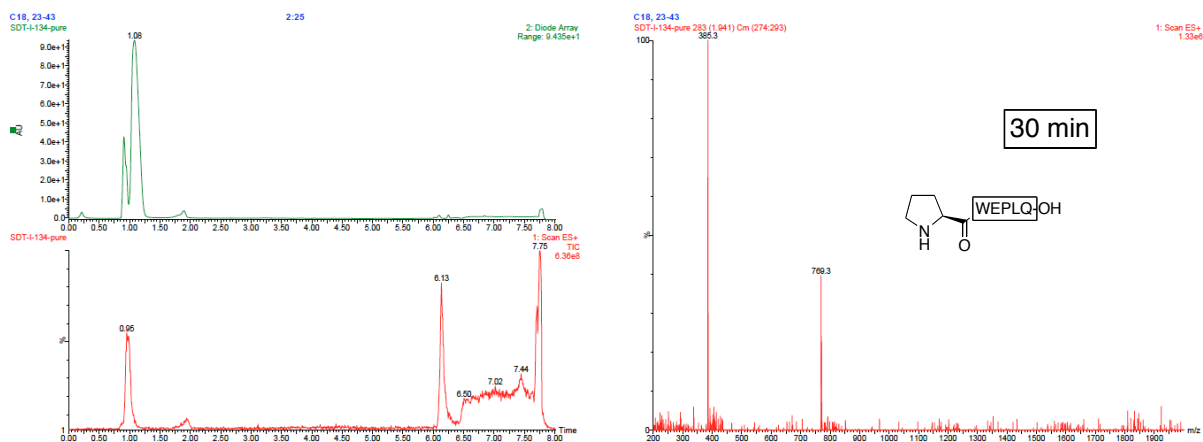

Found:  $[M+H]^+$   $m/z = 769.3$ ,  $[M+2H]^{2+}$   $m/z 385.3$ , 92%

To a solution of selenopeptide (2  $\mu\text{mol}$ ) in 500  $\mu\text{l}$  of ligation buffer (6 M Gdm•HCl, 200 mM  $\text{Na}_2\text{HPO}_4$ ) was added 4-mercaptophenylacetic acid (MPAA, 1.6 mg,  $\mu\text{mol}$ ) to generate the selenylsulfide. After stirring 30 min, Dithiothreitol (DTT, 3 mg, 20  $\mu\text{mol}$ ) was added and the reaction continued stirring 30 min. TCEP (200  $\mu\text{l}$ , 0.5 M) was added and the pH adjusted to 5-6 by 1 M HCl. The reaction mixture was stirred at 23°C, monitored by UPLC-MS and purified by HPLC.

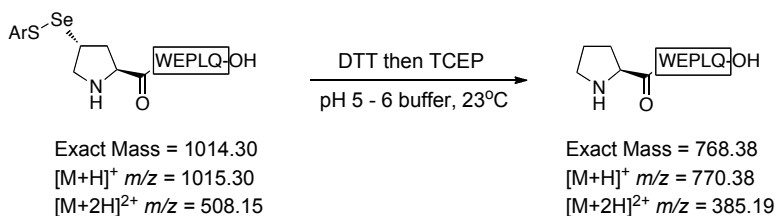

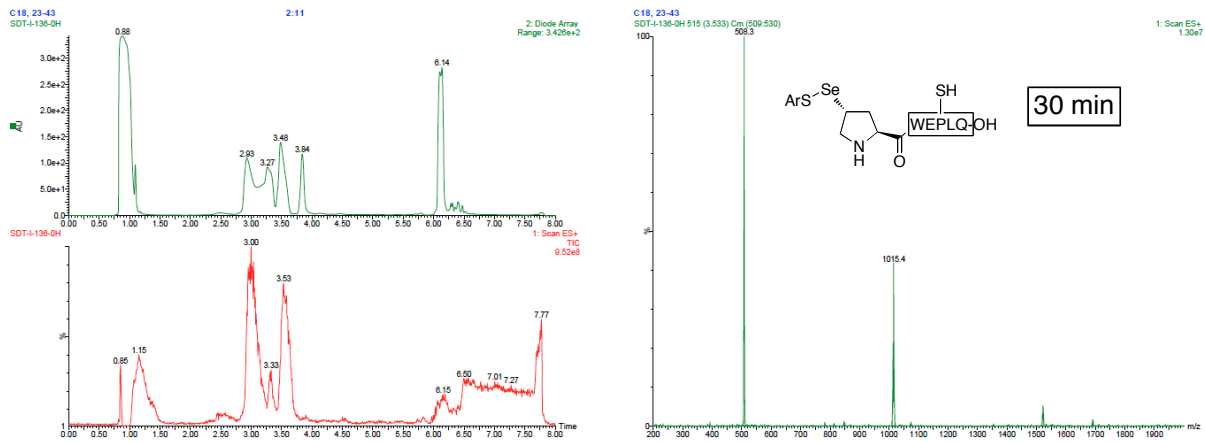

Found:  $[M+H]^+$   $m/z = 1015.4$ ,  $[M+2H]^{2+}$   $m/z 508.3$ .

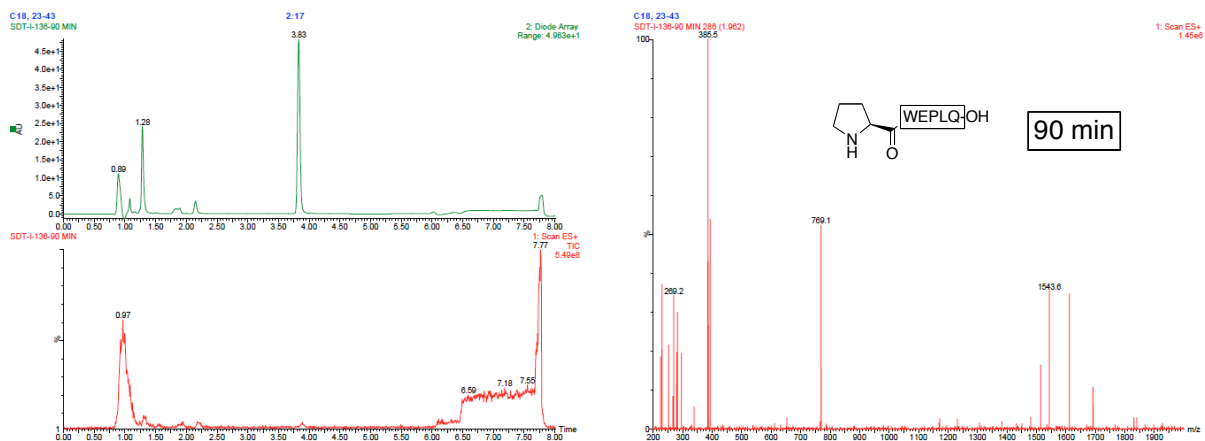

Found:  $[M+H]^+$   $m/z = 769.1$ ,  $[M+2H]^{2+}$   $m/z 385.5$ , 91%

To a solution of selenopeptide (2  $\mu\text{mol}$ ) in 500  $\mu\text{l}$  of ligation buffer (6 M Gdm•HCl, 200 mM  $\text{Na}_2\text{HPO}_4$ ) was added MPAA (1.6 mg,  $\mu\text{mol}$ ) to generate the selenylsulfide. DTT was added and the reaction stirred 30 min. TCEP (200  $\mu\text{l}$ , 0.5 M) was added and the pH

adjusted to 5-6 by 1 M HCl. The reaction mixture was stirred at 23°C, monitored by UPLC-MS and purified by HPLC.

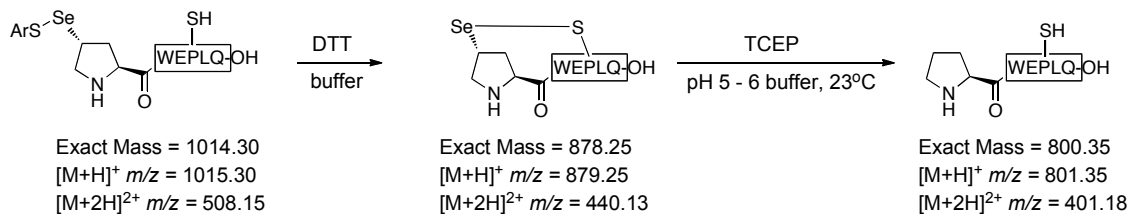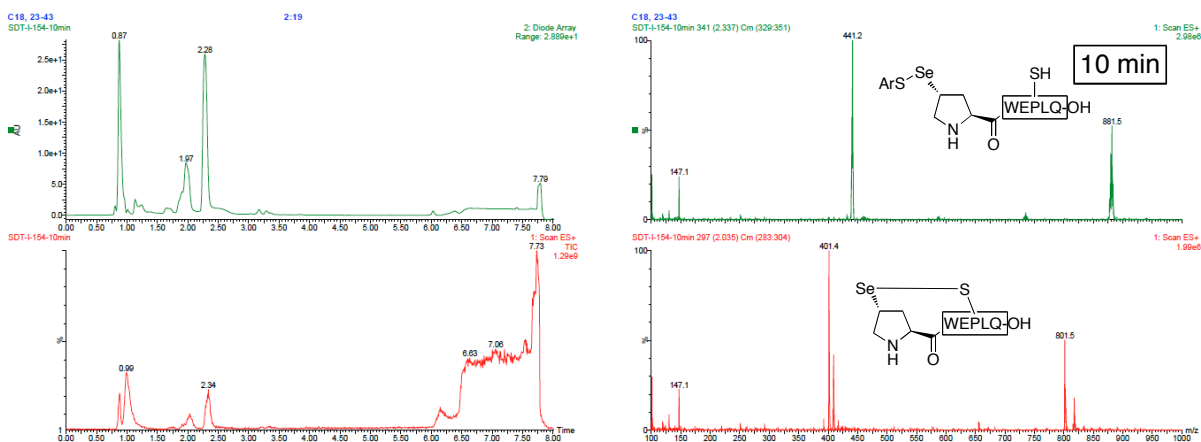

Found:  $[M+H]^+$   $m/z$  = 881.5,  $[M+2H]^{2+}$   $m/z$  441.5.  $[M+H]^+$   $m/z$  = 801.5,  $[M+2H]^{2+}$   $m/z$  401.4.

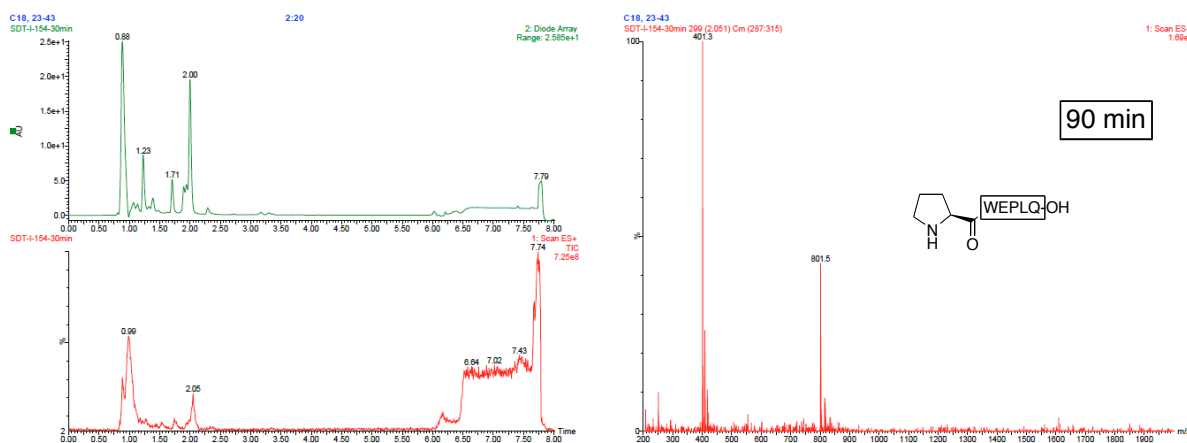

Found:  $[M+H]^+$   $m/z$  = 801.5,  $[M+2H]^{2+}$   $m/z$  401.3, 90%



## Preparation and Characterization of Ligation/Deselenation Products

H-ALLVNSS"AA"-SPh (2 mg, 2.36  $\mu\text{mol}$ ) and diselenide peptide H-PWEPLQ-OH **22** (2 mg, 1.18  $\mu\text{mol}$ ) were dissolved in 1 mL of degassed ligation buffer (6 M Gdm•HCl, 200 mM Na<sub>2</sub>HPO<sub>4</sub>). MPAA (34 mg, 200 mM) was added and the pH of the reaction adjusted to 7.4 to 7.6 by 1 M NaOH. The reaction was degassed (freeze-pump-thaw), allowed to stir under an argon atmosphere at ambient temperature and monitored by UPLC-MS. After consumption of the thioester the reaction was diluted with 50% aq. CH<sub>3</sub>CN to 3 mL and purified by HPLC. The pure selenopeptide was dissolved in 1 mL of ligation buffer (6 M Gdm•HCl, 200 mM Na<sub>2</sub>HPO<sub>4</sub>) and treated with DTT (3.6 mg, 23.6  $\mu\text{mol}$ ). After 30 min, TCEP (500  $\mu\text{l}$ , 0.5 M) was added, the pH adjusted to 5-6 by 1 M HCl, and the reaction monitored by UPLC-MS. After removal of the selenide, the reaction mixture was diluted with 50% aq. CH<sub>3</sub>CN to 3 mL and purified by HPLC.

**Note:** *Separation of the ligation adduct from unreacted N-terminal selenopeptide was difficult. An alternative, one pot protocol was developed.*

H-ALLVNSS"AA"-SPh (2 mg, 2.36  $\mu\text{mol}$ ) and diselenide peptide H-PWEPLQ-OH **22** (2 mg, 1.18  $\mu\text{mol}$ ) were dissolved in 1 mL of degassed ligation buffer (6 M Gdm•HCl, 200 mM Na<sub>2</sub>HPO<sub>4</sub>). MPAA (34 mg, 200 mM) was added and the pH of the reaction adjusted to 7.4 to 7.6 by 1 M NaOH. The reaction was degassed (freeze-pump-thaw) and allowed to stir under an argon atmosphere at ambient temperature. After consumption of the thioester, the crude selenopeptide was treated with DTT (68 mg, 400 mM). After

30 min, TCEP (500  $\mu$ l, 0.5 M) was added and the pH adjusted to 5-6 by 1 M HCl. After removal of the selenide, the reaction mixture was diluted with 50% aq. CH<sub>3</sub>CN to 3mL and purified by HPLC.

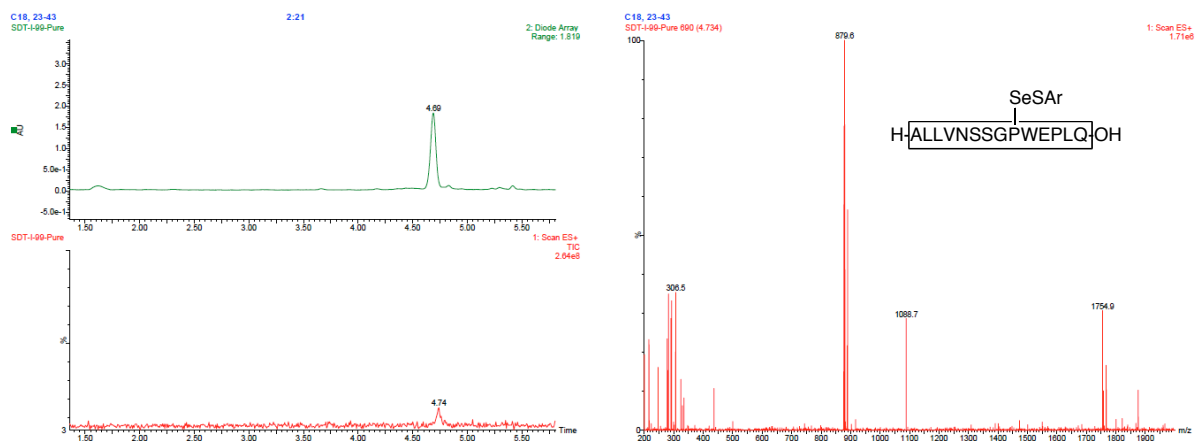

C<sub>77</sub>H<sub>113</sub>N<sub>17</sub>O<sub>23</sub>SSe, Exact Mass: 1755.71, [M+H]<sup>+</sup> m/z = 1756.71, [M+2H]<sup>2+</sup> m/z 878.86.

Found: [M+H]<sup>+</sup> m/z = 1754.9, [M+2H]<sup>2+</sup> m/z 879.6.

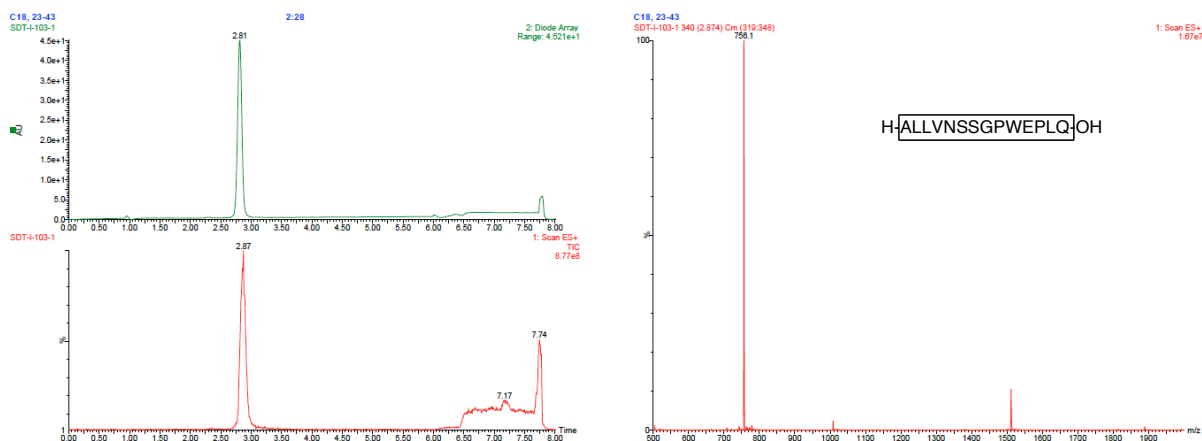

**47:** C<sub>69</sub>H<sub>107</sub>N<sub>17</sub>O<sub>21</sub>, Exact Mass: 1509.78, [M+H]<sup>+</sup> m/z = 1510.78, [M+2H]<sup>2+</sup> m/z 755.89.

Found: [M+H]<sup>+</sup> m/z = 1510.9, [M+2H]<sup>2+</sup> m/z 756.1, 84%

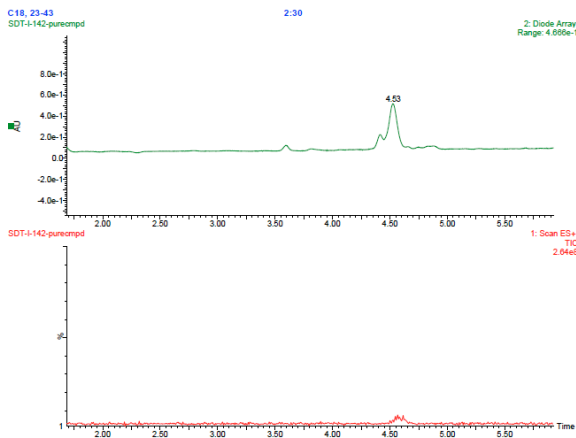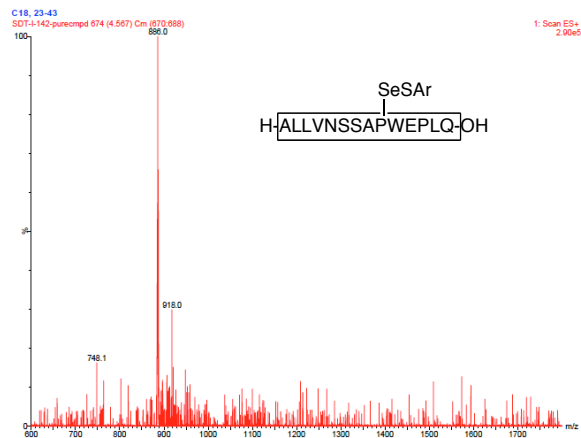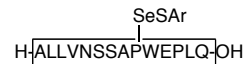

$C_{78}H_{115}N_{17}O_{23}SSe$ , Exact Mass: 1769.72,  $[M+2H]^{2+}$   $m/z$  885.86.

Found:  $[M+2H]^{2+}$   $m/z$  886.0.

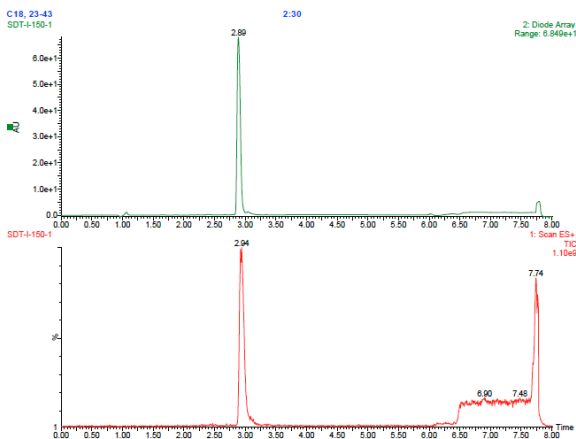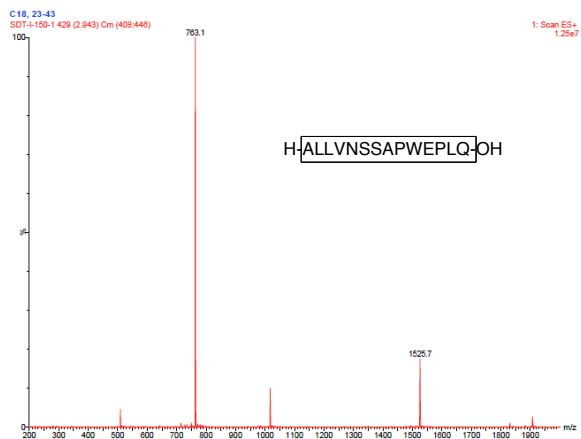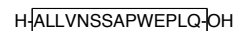

**49:**  $C_{70}H_{109}N_{17}O_{21}$ , Exact Mass: 1523.80,  $[M+H]^+$   $m/z$  = 1524.80,  $[M+2H]^{2+}$   $m/z$  762.90.

Found:  $[M+H]^+$   $m/z$  = 1525.7,  $[M+2H]^{2+}$   $m/z$  763.1, 88%

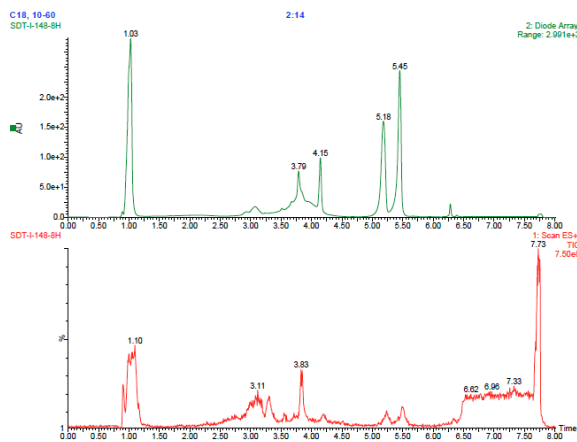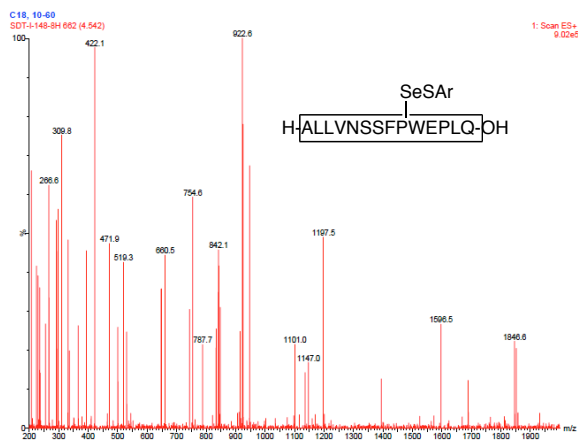

**Crude:** C<sub>84</sub>H<sub>119</sub>N<sub>17</sub>O<sub>23</sub>SSe, Exact Mass: 1845.76, [M+H]<sup>+</sup> m/z = 1846.76, [M+2H]<sup>2+</sup> m/z 923.88.

Found: [M+H]<sup>+</sup> m/z = 1846.6, [M+2H]<sup>2+</sup> m/z 922.6.

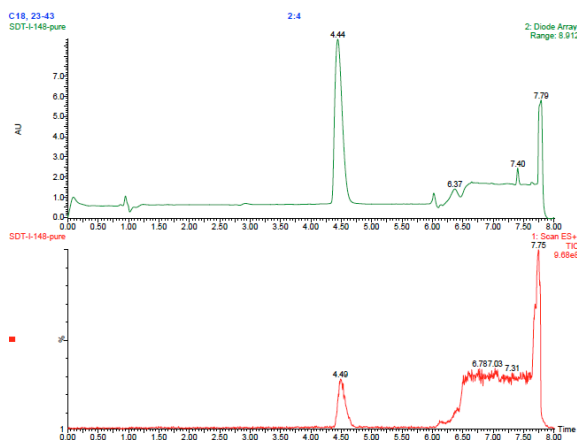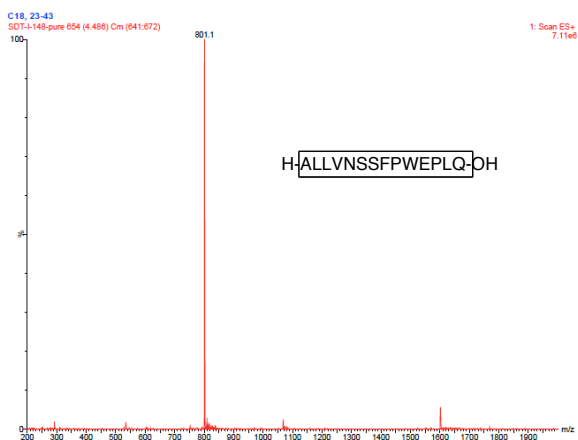

**51:** C<sub>76</sub>H<sub>113</sub>N<sub>17</sub>O<sub>21</sub>, Exact Mass: 1599.83, [M+2H]<sup>2+</sup> m/z 800.92.

Found: [M+2H]<sup>2+</sup> m/z 801.1, 80%

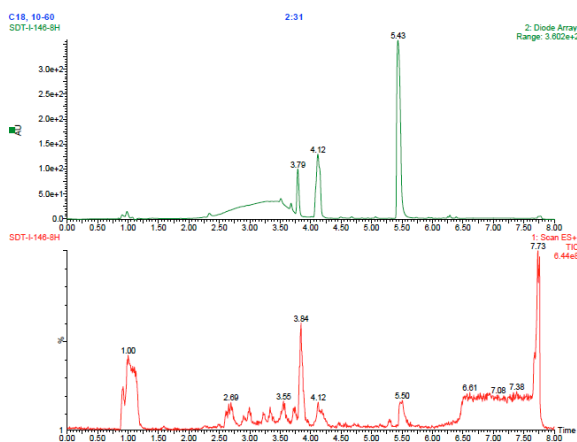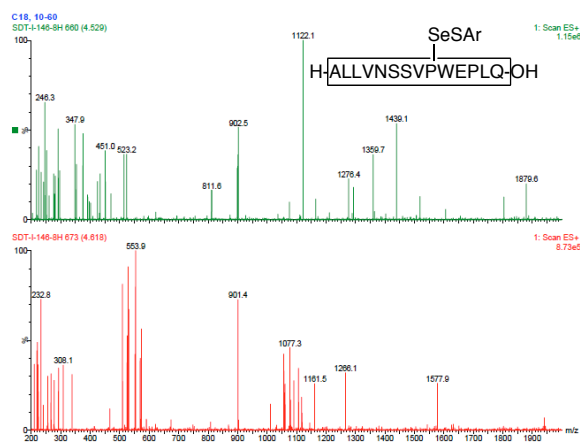

**Crude:**  $C_{80}H_{119}N_{17}O_{23}SSe$ , Exact Mass: 1797.76,  $[M+2H]^{2+}$   $m/z$  900.38,  $[M+4H]^{4+}$   $m/z$  450.44.

Found:  $[M+2H]^{2+}$   $m/z$  = 902.5,  $[M+4H]^{4+}$   $m/z$  451.0.

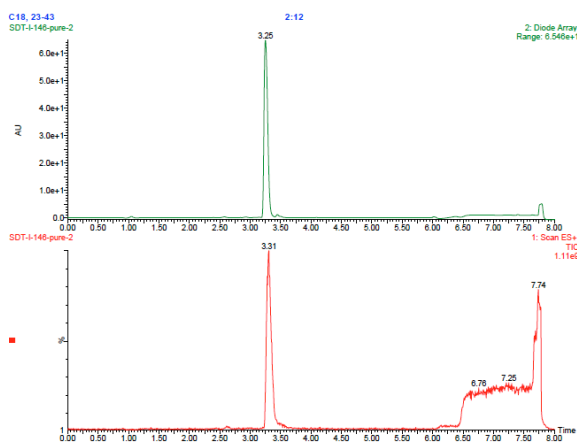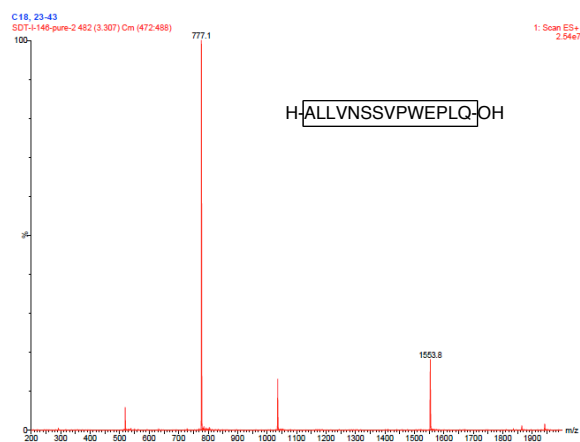

**53:**  $C_{72}H_{113}N_{17}O_{21}$ , Exact Mass: 1551.83,  $[M+H]^+$   $m/z$  = 1552.83,  $[M+2H]^{2+}$   $m/z$  776.92.

Found:  $[M+H]^+$   $m/z$  = 1553.8,  $[M+2H]^{2+}$   $m/z$  777.1, 66%

## Notes and Reference

- (1) Shangguan, N.; Joullie, M. *Tetrahedron Lett* **2009**, *50*, 6748.
